# Supplementary material for: “Kung Flu”—The Dynamics of Fear, Popular Culture, and Authenticity in the Anatomy of Populist Communication
Source: Frontiers journal article supplement (doi:10.3389/fcomm.2021.624643), 2021-11-30
Supplement: Table_1.docx [file Table_1.docx]

Supplementary table 1: Themes, Sub-Themes, Descriptions, and Samples of Coded Text

| **Superordinate themes** | **Sub-Themes** | | **Sub-sub-Themes** | | **Descriptions** | | **Samples of coded text** |
| --- | --- | --- | --- | --- | --- | --- | --- |
| Trump Administration's response to Covid-19 | Economic side of Covid handling | | Evictions  Direct payments to families  Farmers to families food box program  Helping Airlines/Tourism/Gastronomy/Hospitality  Helping Small Businesses  Helping Workers  Unemployment benefits up  Payroll tax cuts  Helping students  Money to the people  Paycheck Protection Program  Rising Job Numbers | | Trump claims that he (unlike Democrats) protects people from evictions they are facing due to the Covid crisis.  Trump assures that he tries to establish “direct payments to families” against the resistance of the Democratic party.  Trump prides himself on having helped both farmers and families overcoming problems related to restrictions implemented during the Covid crisis.  Trump assures help for industries (Airlines, Gastronomy, Tourism, Hospitality) particularly affected by Covid-19 related restrictions.  Trump claims his administration is committed to supporting small businesses during the Covid crisis.  Trump claims that his administration has greatly and successfully supported workers during the Covid crisis.  Trump claims that he has increased and continues to increase unemployment benefits against resistance of the Democratic party  Trump states that he combats – against the resistance of the Democratic party – the impact of Covid restrictions by suspending pay roll tax obligations.  Trump claims to help students financially and regarding examination requirements.  Trump asserts that he is trying to get “money to the people” against the resistance of the Democratic party.  Trump claims to have helped workers, families and small businesses with the “Paycheck Protection Program.”  Trump claims that even during the Covid crisis his administration has been creating record numbers of jobs. | | “I want to make it unmistakably clear that I'm protecting people from evictions. They didn't want to do that. The Democrats didn't want to do a protection from evictions. People getting evicted because of the coronavirus or the China virus, whatever you want to call it.”  “I've directed the Secretary of the Treasury to get ready and send direct payments -- $3,400 for a family of four -- to all Americans. Democrats are holding this up.”  “When the China virus struck our nation, many farmers had no place to send their crops or livestock. At the same time, families across the country were in need of groceries. […] That's why we launched the Farmers to Families Food Box program. Through this program, the Department of Agriculture is purchasing food from farmers, then local distributors pack and deliver the boxes. And families in need get it, and they get to eat very well. We're tremendously grateful for the 185 employees here at this facility who have packed roughly 7,000 boxes a week. That's not bad, Kirby, right? [Applause] Seven thousand boxes a week is a lot of boxes. […] Today, I'm proud to announce that we will provide an additional $1 billion to fund the Farmers to Families Food Box program. It's worked out so well. [Applause] It's worked out so well.”  “The United States will be powerfully supporting those industries, like Airlines and others, that are particularly affected by the Chinese virus.”  “And we're deeply committed to ensuring that small businesses have the support they require. The Small Business Administration announced disaster loans, which provide impacted businesses with up to $2 million. And we've asked Congress to increase the SB lending authority. We're going to be going up to $50 billion and, actually, much more than that for small businesses.”  “Thank you very much everybody. It's good to be with you. I'd like to begin by providing an update on my administration's actions to protect American workers as we battle the China virus since the virus escaped China. My administration has enacted $3 trillion in economic relief. It's been very, very successful and you saw that by the numbers that were issued yesterday and the day before as to used car sales and auto production.”  “Under the CARES Act, I proudly signed expanded unemployment benefits into law. Congressional Democrats have stonewalled our efforts to extend this relief. They even oppose measures that would give bonuses to workers returning to the job. They were totally opposed to that. For this reason, I'm taking action to provide an additional or an extra $400 per week in expanded benefits: $400.”  “I'm providing a payroll tax holiday to all Americans earning less than 100,000 per year, meaning bigger paychecks for working families through the end of 2020. That's a tremendous amount of money that's being supplied and given to families. Tremendous. The Democrats didn't want to do a payroll tax. They thought it was too much money, I guess. Or it would make businesses too successful.”  “I thank you all for joining us, and I'd like to begin by providing an update on what we are doing to minimize the impact of the Chinese virus on our nation's students. With many schools closed due to the virus, the Department of Education will not enforce standardized testing requirements, very importantly, for students in elementary through high school for the current year. They've been through a lot. They've been going back and forth; schools open, schools not open. It's been all standardized testing. And, you know, it's -- we're not going to be enforcing that, so I think you can let people know. I think probably a lot of the students will be extremely happy; some probably not. The ones that work hard, maybe not. But it's one of those things. Unfortunate -- very unfortunate circumstance. We've also temporarily waived all interest on federally held student loans. They'll be very happy to hear that. And I've instructed them to take that action immediately. And today, Secretary DeVos has directed federal lenders to allow borrowers to suspend their student loans and loan payments without penalty for at least the next 60 days. And if we need more, we'll extend that period of time.”  “We're fighting now Nancy Pelosi and Chuck Schumer. Cryin' Chuck we call him, and Crazy Nancy. And there's a lot of truth to both of them. We're fighting them very hard and very strongly on getting money to the people during the pandemic. And we're doing a lot of things.”  “And through the Paycheck Protection Program, we provided nearly $32 billion, over 418,000 small businesses in your state, your great state, saving 3.2 million Florida jobs and we've delivered more than $18 billion in economic impact payments straight to Florida, families.”  “And now, we're rebuilding at a level that nobody's ever seen before. Our job numbers are the best ever. The best on record, almost 5 million jobs last month and the month before that was a record until we just broke it last month. So, it's been really amazing.” |
| Impact of Covid-19 | | Lives lost  People infected  Rallies/convention stopped by virus  Relation to Xi good before virus  Trump would have won election easily without virus  Virus hard for politicians | | Trump laments lives lost due to the pandemic and engages in public mourning.  Trump presents himself as personally affected by the virus by referring to a person close to him that got infected with Covid-19.  Trump laments that political events such as rallies and conventions had to be cancelled or moved online due to Covid-19.  Trump states that the quality of his relation to Xi Jinping has worsened due to Covid-19.  Trump claims that he would have won the election effortlessly had the pandemic not occurred.  Trump asserts that the pandemic is tough for politicians. | | “Many Americans, including me, I have sadly lost friends and cherished loved ones to this horrible disease. As one nation, we mourn, we grieve, and we hold in our hearts forever the memories of all of those lives that have been so tragically taken so unnecessary. In their honor, we unite. In their memory, we will overcome it.”  “I want to just say that Senator Rand Paul -- a friend of mine; he's been a great friend of mine. He's been always there when we needed him, when the country needed him. And, as you know, he just tested positive.”  “We have a COVID problem, COVID-19 problem. As you know, I call it the China virus. It shouldn't have happened but it did. They could have stopped it, but I wanted to be with you, and this is really replacing our rallies that we all love so much.”  “I had a very good relationship with President Xi. I would even say better than good. I would say we had a great relationship. He's a great gentleman. But my relationship is no longer very good with him because of what they did with the China virus.”  “It would have been a very easy election for me to win, very easy. It was looking very easy and then the plague came in and we went back to work and we are now…”  “We got hit by, we were unbeatable, and then we got hit by the China plague, by the China virus, and obviously we got hit hard. That affects a politician. Look all over the world. When you get hit, it affects a politician. We fought.” |
| Opening the Country | | Opening schools  Program for opening schools  Call for/pro opening  Negative impact of lockdowns  Old people and other risk groups more in danger  Opening football  Young people not affected by Covid | | Trump calls for reopening the schools.  Trump presents a program for opening schools.  Trump underlines the importance of ending the lockdowns.  Trump names negative consequences of lockdowns.  Trump argues that Covid-19 is dangerous only for certain risk groups.  Trump assures he wants to end the restrictions of playing and watching football.  Trump claims that young people, particularly children only seldomly develop severe symptoms have low mortality rates when contracting Covid-19. | | “But we want it opened. We want the schools open, Lou. You know, young people, they have better immune systems than we do, Lou. I hate to tell you this. And they are in very good shape -- […] virtually, virtually immune from this disease. They're incredible, the strength of their -- probably, you have to give the credit to their immune system. It's called being young. And yet, with the flu and various other things, they don't do so well. So, you know, somebody will explain that someday, perhaps. […] But they -- certainly, for the China virus, they do very well. They do very, very well. So, we want to open the schools. We are going to be opening most of the schools. The parents, generally speaking, want them open. And we want to do it safely, Lou.”  “Finally, today, my administration is highlighting general recommendations for all schools and guidance to protect high risk teachers and students. We're working very, very closely with many of the schools and school districts throughout the country. They include the following. To ensure all students, teachers and staff understand the symptoms of the China virus. Require all students, teachers, and staff to self-assess their health every morning before coming to school. Encourage frequent hand washing or hand sanitizing during the school day, beginning upon entrance to school and ensuring that hand washing facilities are widely available throughout the school. And for the most part, schools have been very good at that. Minimize large indoor gatherings. Hold large gatherings outdoors whenever possible. Maintain high standards of hygiene and ventilation within the classrooms, including keeping windows and doors open whenever possible and running fans and air conditioning units whenever possible. Require students, teachers, and staff to socially distance around high-risk individuals and socially distance whenever possible in any event. Encourage the use of masks when social distancing is not possible. Post instructions regarding hygiene and social distancing all over the school and all around the school. We encourage schools to adopt these measures. We've been working with so many of them and to the best of my knowledge, virtually every one of them agrees to do that. While we're also providing high-risk teachers and students options to engage in distance teaching or learning, we're working on that also.”  “A state that is a model for applying a science-based approach to the decreasing cases and hospitalizations without implementing a punishing lockdown. Arizona's record in reducing the spread of the virus while maintaining hospital capacity and allowing society to continue functioning and functioning very nicely, very successfully is an example that shows how our path forward can work in other states.”  “Joe Biden's blanket shutdown would collapse our economy. It would cause countless deaths from suicide, drug, alcohol abuse, heart disease, and more. You know, shutdowns cause a lot of problems -- a lot of very serious problems -- more so than the virus itself.”  “We have to produce not only cleanliness and perfection in every way, but we have to protect our most vulnerable citizens against this horrible virus. And that's, generally speaking, the elderly, especially the elderly with problems of the heart -- problems with the heart, and diabetes, in particular. Those two are a basic disaster. Our strategy shelters those at highest risk while allowing those at lower risk to get safely back to work and to school.”  “So I’m the football guy. I’m the one that wants to have football. I put it out all the time. I’m very upset with Big 10. Big 10, they should have opened it, but I’m the one that wants the football. Everybody knows it.”  “If you look at children, I mean, they're able to throw it off very easily. It's an amazing thing. Because some flus, they don't. They get very sick, and they have problems with flus and they have problems with other things. But for whatever reason, the China virus, children handle it very well. And they may get it, but they get it and it doesn't have much of an impact on them. If you look at the numbers, the numbers in terms of mortality fatality, the numbers for children under a certain age -- meaning young, their immune systems are very, very strong. They're very powerful. They seem to be able to handle it very well, and that's according to every statistic.” |
| Handling the virus | | Trump’s critics/enemies recognize value of initial travel ban  Closing borders/country/economy saved lives/helped fight virus  Defense Production Act  Face masks  Great handling of virus  Helping risk groups/elderly people/nursing homes  Increased/improved testing  Operation Warp Speed  Personal responsibility to protect others  Suspending travel  Telehealth  Vaccine & therapeutics | | Trump asserts that even the people who (heavily) criticized his initial travel ban on China recognize now that it was a good decision.  Trump claims that the measures he employed to combat Covid-19 such as border closures and lockdowns were successful.  Trump refers to his supposedly successful invocation of the Defense Production Act.  Trump promotes face masks.  Trump claims that his administration handled the Covid crisis flawlessly.  Trump lays emphasis on the importance of protecting risk groups such as elderly people, particularly in nursing homes (and depicts himself as successful in doing so).  Trump praises the US testing capabilities.  Trump promotes “Operation Warp Speed” as a means to develop and distribute vaccines and therapeutics.  Trump appeals to personal responsibility as a means to overcome the Covid crisis.  Trump refers to travel restrictions he implemented to contain Covid-19.  Trump advertises the improvement of telehealth as a countermeasure against Covid-19 (and as an achievement of his administration).  Trump promotes the development of vaccines and therapeutics (as an achievement of his administration). | | “our body was so powerful that we could actually close our country save millions of lives, stopped people very early on from China from coming in because we stopped early at the end of January very early people coming from China who were infected coming into our country. That was a very hard decision to make nobody almost nobody want me to make it. I would almost say nobody wanted me to make it but we may that decision and even my enemies that I was an extremely important -- we save tens of thousands of lives with that decision.”  “When the China virus invaded our country, we had no choice but to shut down our economy. We saved millions of lives by doing it, but we had to shut it down.”  “Today, the Office of Trade and Manufacturing Policy released a new report on how my administration has harnessed the full power of the Defense Production Act to achieve the greatest industrial mobilization since World War Two, in our fight against the China virus. New factories, businesses, and laboratories are being built all over America to match our nation's demand for personal protective equipment, pharmaceuticals, drugs, testing supplies, therapeutics, and vaccines.”  “We are United in our effort to defeat the Invisible China Virus, and many people say that it is Patriotic to wear a face mask when you can’t socially distance. There is nobody more Patriotic than me, your favorite President! (BW photo of Trump with mask)”  “All of this incredible news is the result of historic actions my administration has taken working with our partners in Congress to rescue the U.S. economy from a horrible event that was formed, took place in China, and came here. And they could have stopped it. They could have stopped it. Nobody likes to write that, but they could have stopped it. They know it, and I know it. Through the Paycheck Protection Program, we've extended over $520 billion in loans to nearly 5 million small businesses, saving and supporting the jobs of tens of millions of American workers. This has been a tremendous success; levels that nobody has ever seen before. But we saved all of those -- all of those jobs and all of those small businesses. And some will be large businesses soon, perhaps.”  “The median age for those who die from the virus is 78 years old, and nearly half of the deaths have occurred among those living in nursing homes or long-term care facilities. That's really something. In other words, approximately half of the fatalities have occurred among less than 1 percent of the U.S. population. So think of that: less than 1 percent, half of the fatalities. So we know what to look for. From the beginning, we have made it our top priority to shelter our seniors. In early March, we announced guidelines suspending all medically unnecessary visits to nursing homes and prioritized resources for those facilities. And we gave it a very strong priority.”  “The United States has now administered over 70 million tests, more than all of the European Union combined. If you combine all of Europe, it's less than what we do. Millions of point-of-care tests are processed in less than 24 hours and many in under 15 minutes. Nearly 80 percent of all commercial lab test results are now returned within three days. So we've gotten that number down from about eight days to three days, and that's only in the longer-term lab cases. But we have many 15- minute tests; we have some 5-minute tests. The turnaround time for federal surge testing sites is just two days. So when you send them out, despite the fact that you have a delivery time, which you can't do anything about, it's all the way down to two days. That's a very substantial reduction. Great job by the people that do it.”  “Through Operation Warp Speed, we will deliver a vaccine in record-breaking time. We're doing very well on the vaccines. We have many, many different vaccines being studied right now, many of which are looking really good. And we're ready to distribute the vaccine when we get it. We're all set. Taking a risk -- an economic risk of preparing for delivery because we feel very certain it's going to be there. But logistically, we have our military ready to go. We have generals that that's all they do is distribute things, and they're going to be distributing, hopefully, a vaccine or a therapeutic, and it's coming out really well. And I think you're going to have some good news very, very quickly having to do with the vaccines. We're also working with many other countries on the vaccine. Many countries are working with us. We're unleashing our nation's scientific genius to kill the virus.”  “The single best way to defeat the disease is personal responsibility. You've heard me say it. You've heard a lot of people say it, actually. I urge all Americans to protect the elderly. The fact is you have to do the social distancing thing. It's very important. Socially distance. Wear a mask when you cannot avoid crowded places or socially distance. And wash your hands as often as possible.”  “We've also reached agreements with Canada and Mexico on new travel rules at our northern and southern borders to halt the entry of the Chinese virus while continuing trade and commerce. And we've had very good talks, I've -- with Prime Minister Trudeau, and today, this morning, with President López Obrador. And we talked about joint measures that we're taken to prevent the spread of the virus in our countries and to temporarily suspend nonessential travel. We had a great conversation this morning -- the President of Mexico. And our close cooperation with Mexico and Canada will keep our people healthy, keep their people healthy, keep everybody safe.  “We've also learned that telehealth is very good. Telehealth is up 3,500 percent. It's doing great. Can you imagine that -- 3,500 [percent] -- where people can stay in their -- in their homes, their apartments, wherever they are, and they cannot have to go to hospitals and doctors and everything else? That's been an incredible success. You know, who would have thought? That's become tremendous and really has been good.”  “And medicine -- accelerating the delivery of lifesaving treatments and ensuring that we will have a vaccine in a record time. We're doing fantastically well on that. That'll be for another time, another meeting. But we are doing, on therapeutics and vaccines, incredibly well. No administration in history has removed more red tape more quickly to rescue the economy and to protect the health of our people. When you think of it, we are all set up; that as we get the vaccine or therapeutic -- and we're set up, militarily -- we're going to be delivering it in record time. It's all set to move. We put an investment upfront. And we have logistical people -- generals, great people -- they're going to be delivering this all over the country as soon as we have it.” |
| America First! | Made in the USA | | Anti Globalization  American miners back to work/wages up  Jobs back from China  Strengthening domestic manufacturing  Tariffs/Trade Deal | | Trump criticizes “the golablists” who shipped production and related jobs overseas.  Trump states employment for US miners has been recovered and their wages have increased vastly despite the Covid crisis.  Trump states that he brings back jobs from China and prevents jobs from being shipped overseas.  Trump prides himself on strengthening domestic production – related to goods needed for overcoming the pandemic and beyond.  Trump claims to have negotiated a trade deal with China, imposing tariffs on Chinese goods, that no administration has achieved. | | “Well, look, I've been fighting this with China for a long time. You had the globalists. They want to make everything in China. We can make our pencils here.”  “Our miners are back on the job and wages have increased by as much as 50% and they're doing great even during the China plague, they're doing great and the China plague will fade but we will not forget. If Biden wins, the Iron Range will be shut down forever.”  “We'll create "Made in America" tax credits and bring our jobs back from China to the United States. And we'll impose tariffs on companies that desert America to create jobs in China and other countries. If they can't do it here, then let them pay a big tax to build it someplace else and send it into our country. We'll prohibit federal contracts from companies that outsource to China. And we'll hold China accountable for allowing the virus to spread around the world.”  “My administration has also eliminated massive regulatory barriers in our battle against the China virus. These actions save countless lives, speeding up the production of equipment. That means ventilators like nobody has ever seen before. Probably the greatest source of manufacturing, the greatest achievements since World War Two. We're now making ventilators for countries all over the world.”  “And, you know, we just signed a very big deal with China. They're paying us a lot of money in tariffs and other things. They never paid us 10 cents. Look, China has taken advantage of the United States -- until I came here -- with Sleepy Joe Biden and Obama and Bush and everybody else. I'm not blaming them; I'm blaming everybody. They were allowed to -- $500 billion a year they were taking out. We had trade deficits that were so large nobody's ever seen anything like it. And we've changed it. Look, now we're taking in billions of dollars.” |
| NAFTA vs. USMCA | | Against Nafta/Pro USMCA/Canada stole jobs and manufacturing  Against Nafta/Pro USMCA/Mexico stole jobs and manufacturing | | Trump takes credit for replacing Nafta with USMCA, criticizing primarily Canada for its past behavior regarding the economic competition with the USA.  Trump takes credit for replacing Nafta with USMCA, criticizing primarily Mexico for its past behavior regarding its job market driven economic competition with the USA. | | “We replaced probably the worst trade deal ever NAFTA with the brand new USMCA, which puts us right at the top. And now Canada and Mexico are doing what's right for our country. It's been a great deal. And when the Wisconsin timber industry was being threatened by administration, took immediate action. We imposed tariffs on dumped foreign goods and subsidized products, saving countless timber jobs all across your state, and you know exactly what I'm talking about. You were taken advantage of by stupid US policy. Canada was taking advantage of this country. Not anymore. If Biden and the crew get in, the radical left will bring timber production to a total halt.”  “And most importantly, I think for you, the automobile business. We've officially replaced the disaster known as NAFTA with the brand new USMCA. The USMCA is expected to create hundreds of thousands of new automotive jobs in the next few years and a lot of those jobs are going to Michigan. You know that. You see all of the plants that have been built and you see all of the plants that have been expanding in Michigan. I was -- I received years ago, I guess 10 years ago, the man of the year in Michigan and I got up and I said how do you let other countries take your jobs? I couldn't believe it. I mean, I was a student of Michigan at the time. I loved the state, loved the people, I have a lot of friends but I wasn't a student. But I did know that you were losing your automobile business. Actually, 32% of it went down right now. Mexico has 32% of our business. They were taking our plants and everything else in historic levels and I stopped it. It's been stopped. And now, you're going to see a lot of activity coming back in and coming back into Michigan in particular, but also other states within our great country.” |
| Trump’s border policies | | Border Wall (vs. Democrats)  Border Wall protects from illegal immigration, crime and virus  Criminals from the south  Human trafficking/Covid  War on drugs/border control | | Trump takes credit for building a border wall to Mexico against the resistance of the Democratic party.  Trump assures that the border wall to Mexico keeps illegal immigrants, crime, and Covid-19 out of the USA.  Trump is pointing at the danger of criminals from the south (hombres).  Trump points at the problem of human trafficking, particularly during the pandemic, and claims that the border wall reduces it.  Trump claims his administration has conducted a successful crackdown on drug trafficking prior to the pandemic. | | “And I've just come from the Arizona border, Yuma -- [applause] -- where we marked the completion of over 220 miles of brand-new, beautiful border wall. [Applause, Audience chants "Build that wall"] You know, you don't hear about the wall. They don't want to talk about the wall anymore. Do you notice? Never has the Democrat Party fought so hard against something. And do you notice? They never talk about the wall. Because, in the end, they gave it up. They gave up. We won. We're building it. Fully funded. [Applause] I could build numerous walls with all of the money I have. Fully funded. [Laughter] But do you know why they don't talk about it? Because it's a bad subject. Remember? They used to say, "It's obsolete. We want drones." Oh great, the drone is flying around. We're going to watch everyone pour into our country with a drone. [Laughter] Remember? They said, "The wall is obsolete."”  “We now have 275 miles of wall completed and we'll have almost everything completed 500 miles by the end of the year or shortly thereafter. It's had a tremendous impact on people coming into our country illegally. We have record, record stoppage right now, which is really good. Who would have known? It was also good because Mexico has a tremendous problem with the coronavirus or the China virus, call it whatever you want. But they have a tremendous -- one of the -- most highly -- unfortunately, infected countries and wherever you have the wall, nobody comes in. So we're up to about 275 miles of wall and it's amazing. The press doesn't talk about the wall anymore. They used to talk about nothing but the wall when they thought it would be impossible to get built. But I got it built and it's now going to be finished very soon.”  “You know, I've used the word on occasion, hombre, a very tough hombre is breaking into the window of a young woman whose husband is away as a traveling salesman or whatever he may do. And you call 911 and they say, I'm sorry, this numbers no longer working. By the way, you have many cases like that many, many, many, whether it's a young woman or an old woman, a young man or an old man and you're sleeping. So what are you going to do, right?”  “Finally, today, I'm pleased to announce that the Department of Justice has issued $35 million in grants to 73 organizations nationwide, providing assistance to human trafficking victims. A terrible thing. You think of human trafficking as being an ancient form of crime. It's not because of the internet. It's a very modern crime all over the world. Not just here, all over the world, human trafficking. It's usually in women or women and children. But it's, again, because of the internet. It's a terrible situation. Never been like this. And also, survivors who have faced heightened dangers during the pandemic, it's actually increased during the pandemic. I guess some reasons are obvious and some reasons are less obvious, but human trafficking, we're working very, very strongly. The wall is up to 277 miles right now. And it's going up. By the end of the year, it'll be largely finished shortly after the end of the year. And it's had a tremendous impact, a very positive impact on human trafficking.”  “In just 12 weeks, SOUTHCOM's surge operation, conducted with key regional partners, has resulted in more than 1,000 arrests and the interdiction of 120 metric tons. I can only tell you that's a lot of narcotics, worth billions and billions of dollars. We're determined to keep dangerous drugs out of the country and away from our children. We're securing our seas. We're securing our borders. This is a new operation, not been done before. And this operation has been incredibly successful. As you know, in the United States, at least before the COVID came to us -- the flu, the virus, the China virus, whatever you'd like to call it; it's got many different names -- but before it hit, we were doing really well, and we're still doing very well, but now we're getting back on track. Last year, 70,000 precious American lives were taken because of the poison that cartels bring into our country. Under my administration, drug overdose deaths fell for the first time in nearly 30 years. And they fell fairly substantially. Unfortunately, the shutdowns caused by the China virus have led to a recent rise in overdose deaths, still below the level that they were at. But nevertheless, it went up a little bit.” |
| USA ripped off by NATO member states/EU | | Trump claims that he stood up against NATO member states who took advantage of the USA. | |  | | “We've been taken advantage of with respect to NATO. Many of the countries, of the 28 countries, you had 20 of them are not paid and they're delinquent, frankly. They owe a lot of money. They don't pay their bills. And the United States made up the difference and we were taken advantage of. I got them to pay $130 billion more, going up to $400 billion more a year. And Secretary General Stoltenberg is probably my biggest fan. He said I -- he never thought that could happen. But these are countries that weren't paying and now they're paying tremendous amounts and much more, it's good. So we're getting that straightened away. We are getting the trade straightened away, European Union took tremendous advantage of us.” |
| Attacks on Democrats | Biden/Democrats are unfit | | Biden and Obama did a bad job  Biden is generally unable/unfit  Biden's bad job on SARS/Swine flu  Clinton would have made war  Democrat's poor handling of virus/of everything  Trump is tougher on Germany (NATO, trade surplus) than Biden  Obama and Biden as reason for Trump being president | | Trump asserts that the previous administration did not live up to expectations, contrasting it with his own achievements.  Trump gives examples such as language use to portray Biden as generally unfit to run for office.  Trump claims that Biden greatly underperformed when combatting H1N1 in 2009.  Trump claims that, unlike himself, Hillary Clinton would have started a war as president.  This category unites Trump’s statements on the alleged inability of Democrats to handle the Covid crisis and other tasks they are entrusted with.  Trump alleges that Germany is “delinquent” regarding its NATO obligations and because of their trade surplus. To Trump, Biden is not able to solve those issues.  Trump contrasts his supposed efficiency with the allegedly inefficient Obama administration which is considers the reason why he could become and became president himself. | | “But the fact is, Biden and Obama, I'm here, I'm in the White House because of them. If they did a good job -- people forget, but if they did a good job, and except for the China virus that came in, we were setting every record you could set for unemployment, for the stock market, every single record you could imagine. And then what we did, we rebuilt the military. We got rid of regulations at a level that no administration even in eight years or in one case, more than that, no administration has come close. And we've appointed -- you know, we will have almost, it could even be more, but almost 300 federal judges appointed by the end of my first term. That's a record. Nobody's ever done anything like that. And two Supreme Court judges, great ones.”  “Do you ever notice that Biden -- no, do you ever notice that Biden oftentimes gets the state wrong? He's in Iowa and he says, it's good to be in Idaho. No, no, you're in Iowa. He's in New Hampshire and he says, it's great to be in Ohio. No, no, no, you're in New Hampshire. That happens to him all the time. It hasn't happened to me yet. You know, when that happens, there's nothing you can do to make up for it. You might as well just walk off the stage because the speech is a disaster. True. Right? Right?”  “The swine flu was a disaster, you remember, when -- not nearly as deadly, not -- not the same world. But when Joe Biden was Vice President, his failed approach to the swine flu was disastrous. He called it -- he called it N1H1; it's actually H1N1. You know, you remember the "H" comes before the "N," so it's sort of easy to remember, right? But Joe -- Joe always calls it the opposite way, but it was -- call it the "swine flu." It was disastrous. And his own chief of staff said that when Biden helped manage the swine flu in 2009, they, quote, "did everything possible wrong." And 60 million Americans got H1N1 in that period of time. This is a quote from his chief of staff.”  “With Iran, and with China, and with everybody, Russia, we're dealing with Russia right now on a nuclear arms pact, because, and they want to do it. They want to do it badly. I don't think they'll wait. I think they want to do it. And it's a great thing. This is the biggest problem in the world today. We're dealing with Russia right now on that. But I'll tell you this. With China, but with Iran and North Korea, look what North Korea, everyone thought we were going to be, if Hillary Clinton got in, you would be, maybe the world would be over by now. But millions of people would have died. You would have had a war with North Korea. He expected to have a war. Where's the war. You don't have a war. And we have a very good, you know, very different, but very good, relationship.”  “And we're going to be doing some things that are very good, because we don't think that she -- look, what Chuck Schumer wants more than anybody -- and I would say Nancy Pelosi would be second -- they want to bail out cities and states that have done a bad job over a long period of time. Nothing to do with coronavirus or China virus, or whatever you want to call it. They want to bail out cities and states. They want bailout money. They want to trillion dollars in bailout money, and a lot of people don't want to do that because we don't think it's right. The Democrats have run some very bad states and some very, very bad cities, and a lot of people don't want to give them a trillion dollars to reward them for doing a bad job. If you look at some of the states -- I won't insult anybody by naming those states, but you know what they are. They want bailout money. They're not interested in the people. They're not interested in unemployment. They're not interested in evictions, which is a big deal -- the evictions. They want to evict. A lot of people are going to be evicted, but I'm going to stop it because I'll do it myself if I have to. I have a lot of powers with respect to executive orders, and we're looking at that very seriously right now. But what the Democrats want, they want -- they're slow-rolling it, and all they're really interested in is bailout money to bail out radical-left governors and radical-left mayors, like in Portland and places that are so badly run. Chicago, New York City -- you see what's going on over there. Bailout cities and states who have been poorly run and spent a fortune doing it, they want a trillion dollars, and we're really not interested in that.”  “But Germany owes billions and billions of dollars to NATO. And why would we keep all of those troops there? And now Germany is saying it's bad for their economy. Well, it's good for our economy. Germany is delinquent. They're at 1 percent. They should be at 2 percent. And actually, everybody should be at 4 percent, not 2 percent, because 2 percent is too low. But they're at 1 percent, and they've taken advantage of us for many years. And you think that's bad? They take worse advantage on trade. And I was all set to fix that, and then we got hit with the China plague. But we'll be fixing it. And a guy like Biden -- this country wouldn't have a chance. With Biden, our country wouldn't have a chance.”  “And when I look at what we have -- now, look at how bad he was, how ineffective a President he was. He was so ineffective, so terrible. Slowest-growing recovery in the history -- I guess, since 1929 -- on the economy. Don't forget, until the China virus came in, we had the greatest economy in the history of the world. And now we're doing it again. I'm going to have to do it a second time. We're doing it again -- hard to believe. We're doing very well. You heard the numbers; they're way, way down on the -- on the virus. But when you look at the kind of numbers that we're producing on the stock markets, we're almost at the level -- in fact, NASDAQ and S&P are higher than they were at their highest point prior to the China virus coming in -- the plague coming in. No, President Obama did not do a good job. And the reason I'm here is because of President Obama and Joe Biden. Because if they did a good job, I wouldn't be here. And probably, if they did a good job, I wouldn't have even run; I would have been very happy. I enjoyed my previous life very much, but they did such a bad job that I stand before you as President.” |
| Democrats are bad for the economy | | Biden/Democrats want to destroy US economy  Biden would let market crash  Democrats want to raise taxes/overregulate  Democrats/AOC/Biden catastrophic in energy politics  Obama administration failed in recovery of financial crisis  Democrats wrong approach to economic issues | | Trump states that Democrats, particularly Biden, would ruin the US economy.  Trump alleges that Biden would let the market crash.  Trump maintains that Democrats would raise taxes and overregulate the economy to unsustainable levels.  Trump claims that Democrats (such as Biden and Ocasio-Cortez) are a threat to the energy sector, which he contrasts with his own energy policies.  Trump states that the Obama administration was not able to foster a fast recovery from the financial crisis (which he contrasts with the current economic recovery).  Trump states that Democrats are generally inefficient when it comes to economic issues. | | “Now Joe Biden is pushing a platform that would demolish the U.S. economy -- totally demolish it.”  “And we’re coming back and coming back strong and my biggest headwind is Biden because everyone knows that if Biden gets in, this market’s going to crash.”  “As our economy rebounds, there's only one thing that could stop the extraordinary economic comeback and wipe out the future of American workers -- and that's what the Democrats want to do with a $4 trillion tax hike -- implementing things that will be really bad for our country. And this will just absolutely cripple what we're doing on regulations and so many other elements of success. We had the greatest economy in history, prior to the China virus coming in. Now they want to stop regulations. They want to bring up regulations to a level -- stop the things that we're doing, which are at a much smaller level, and bring up regulations at a level that nobody has ever seen before. They want to do things that will make it impossible for any economy to grow.”  “So, Texas and Oklahoma and North Dakota and many other states would have been hurt. Now, you think you're going to be hurt there, you try putting AOC in charge of your energy. That will make the pandemic look like child's play to the people in energy. She has one problem, it's called petroleum. No President or administration has done more in the first three and a half years than the Trump administration. Not even here, nobody. Our incredible success in rebuilding America stands in stark contrast to the extremism and destruction and violence of the radical left.”  “We're witnessing the fastest labor market recovery from an economic crisis in our history. By contrast, the Obama-Biden administration had the slowest, weakest, and worst recovery in American history, as you know.”  “We're going to do additional tax cuts as opposed to massive tax increase which is going to lead us into a depression is what they want to do. What they want to do is lead us into a depression. 401k, stocks, everything is going to go right down the tubes.” |
| Democrats do not enforce law and order | | Democrats want to defund police/already defunded  Democrats want to release criminals from jail  High crime rates in democratic states  No law and order in states run by Democrats/Biden no law & order | | Trump criticizes that Democrats appear to be defunding the police.  Trump alleges the Democrats plan to release criminal offenders from jail.  Trump insinuates that states governed by Democrats have high crime rates.  Trump alleges that Democrats, particularly Biden, are not able to maintain law and order. | | “And the law enforcement and the New York's Finest are as good as it gets, and they should be allowed to do their job. If they do their job, if they're allowed to do their job, the New York City problem will be solved and be solved quickly. They do it well. The mayor, Bill de Blasio, should immediately hire back all of the police who were fired without justification. They were fired. I guess that's part of "Defund the Police" by the Democrats. They should hire New York City's Finest back. You have some incredible policemen doing specific jobs that nobody else can do, actually, when it comes to terrorism and other things.”  “Democrats are insisting on a massive taxpayer bailout of badly run blue states, stimulus checks for illegal aliens, and the mass release of inmates from jail. They want to release a lot of inmates, some of them for very serious reasons. They want to release them from jail.”  “We actually -- it's hard to believe. We have record-low crime numbers but you look at some of the states run by Democrats, run cities also run by Democrats. It's really very, very disgraceful and we look forward to solving that problem.”  “But the other thing about Joe Biden, he's not a strong person and he's not strong for law and order and everybody knows that. And this is today about law and order. When you see a scene like happened just last night in California with the two police people. A woman, a man, shot at stone-cold short-range right through a window and we're looking for him, we're looking for that person, him, we think. And when we find that person, we've got to get much faster with our courts and we're going to get much tougher with our sentencing. We have to come out very, very strongly.” |
| Immigration/border policies | | Biden/Democrats welcome immigration  Democrats are pro open borders  Democrats want to abolish ICE, letting crime into country  Democrats want to abolish borders  Democrats would let criminals stay in USA | | Trump alleges that Democrats (especially Biden) welcome uncontrolled immigration.  Trump states that Democrats/Biden consider open borders a must.  Trump claims that Democrats aim at abolishing US Immigration and Customs enforcement, which, according to Trump, leads to an influx of criminals.  Trump claims that the Biden/Harris administration would abolish US borders, leading to severe consequences.  Trump alleges that Democrats would not be able to remove illegal criminal immigrants. | | “Joe Biden, on the other hand, has pledged to allow virtually unlimited immigration during a global pandemic, spreading the virus, overwhelming our healthcare system, and displacing millions of American job seekers. The Biden plan would institute catch and release, I got rid of it, along the entire Southwest border. This is where you catch perhaps a murderer, perhaps a rapist. You catch somebody, you take their number and you release them.”  “Biden's campaign has turned into a cult for open border and others Zealots.”  “They want to abolish ICE. Do you have any idea how patriotic ICE people are? I know them. They are very tough. I agree. [Applause] Very tough. They're very tough. I agree. They like to fight. I agree. But you don't want to do it. Look, I'm looking at some pretty tough guys right here. Look. You're not going to do. He's not going into an MS-13 nest, swinging, swinging. No. These guys are tough. They're smart. They're getting them out by the thousands. They're taking MS-13 out of our country by the thousands. [Applause] They want to abolish ICE, get rid of ICE, abolish bail. They want no bail anymore. Just, you know, we put you in for murder. "It's okay, come back whenever you have a chance." [Laughter] You see what's going on in some places like Philadelphia -- what's happening in Philadelphia, what's happening in other cities. [Audience member calls out "Chicago"] Look at what's going on in Chicago. What's that all about? Chicago was a great city. But they want to abolish borders and abolish every police department in the country.”  “The Biden-Harris plan is a step by step recipe for abolishing America's borders. In the Biden, Bernie manifesto, Joe Biden, promises to restore and expand catch and release across the entire US border. You believe that? We just got rid of it. Free all illegal aliens from federal detention and close detention facilities, this would make removing illegal aliens totally impossible, and you would have murderers, killers, rapists in your midst. I don't think so. Immediately suspend all removals, triggering a tidal wave of, really a flood, if you think, a flood all across our border. End prosecution of illegal border crosses ensuring that illegal aliens will repeatedly reenter the country over and over again and terminate all protections we have enacted against asylum fraud.”  “The Biden-Harris plan is a step by step recipe for abolishing America's borders. In the Biden, Bernie manifesto, Joe Biden, promises to restore and expand catch and release across the entire US border. You believe that? We just got rid of it. Free all illegal aliens from federal detention and close detention facilities, this would make removing illegal aliens totally impossible, and you would have murderers, killers, rapists in your midst. I don't think so. Immediately suspend all removals, triggering a tidal wave of, really a flood, if you think, a flood all across our border. End prosecution of illegal border crosses ensuring that illegal aliens will repeatedly reenter the country over and over again and terminate all protections we have enacted against asylum fraud.” |
| Democrats side with China | | Best Military/Democrats want to defund it/necessary against China  Biden's son helps sell US to China  Biden/Democrats are pro China/work for, helped China  Russia/China wants Biden  When Biden wins, China wins | | Trump criticizes that Democrats want to defund the US military that Trump claims to have rebuilt and that is necessary to confront China as a growing military superpower.  Trump claims that Biden’s son Hunter has participated in the sale of a US car industry supplier to a “leading Chinese military defense contractor.”  Trump alleges that Democrats (Biden in particular) favor China over the US and supported its rise.  Trump claims that Russia and China (among others) would profit from and welcome Biden winning the election.  Trump maintains that should Biden win the election, China would gain a crucial advantage over the USA. | | “Now the Democrat Party is calling for defunding of our military. Think of that: defunding. They want to defund our military when China is building a massive military. They're building a massive military, and Biden wants to defund our military. And the world needs American strength right now more than ever, and we've got it. We've -- we've got now, soon -- as it -- all this equipment comes in, all made in the USA -- we've got the newest, most incredible weapons anywhere in the world. We have the best tanks, the best ships, the best missiles, rockets. We have the best of everything. We have the best fighter jets -- the F-35, the F-18. All of these assets are being built. Tankers -- incredible tankers. Bombers. Hope we don't have to use them, but we have the most incredible military. When I came in, the military was totally depleted.”  “Biden is weak on China. Yesterday, it was revealed that a fund -- partly owned by Joe Biden's son, Hunter -- facilitated the sale of a Michigan auto parts producer to a leading Chinese military defense contractor. You don't want to write about that, do you? Biden spent his entire career selling Michigan jobs to China. Now the Biden family is selling out our country directly to the Chinese military, which has to do with this company that Hunter -- here we go with Hunter again. He didn't have a job; now, all of a sudden, he's selling companies from Michigan to China. China's military got American manufacturing jobs, and the Biden family got paid a lot of money.”  “Indeed, Biden expressed more fawning praise about China on an ordinary day than about America on the Fourth of July. The last Independence Day, Biden attacked the United States and said we had, quote, "never lived up to" the ideals of our fathers, our forefathers, or our Founding Fathers -- those founding ideals. And yet, he enthusiastically stated that China is a "great nation" and we should hope for its "continued expansion." Well, we all wish well to China, but what China has unleashed on the world, it's -- it's hard to even fathom. I see people now, friends of mine -- they walk up, they want to say hello, and they have to keep their distance, and they're all covered up, like you're all covered up, with facemasks. It's a different world, but we're coming out on top. Biden sides with China over America time and time again. And he said, on the Fourth of July, "American history is no fairy tale." And yet, blindly celebrates China, saying, "few... nations in history have come so far, so fast." He's so proud of them. He's so proud of them.”  “They want to keep everything as much as they can closed down because the only thing they have in mind is November 3rd, and you don't want Joe Biden as your President. That I can tell you. Who does want him is China, Iran, Russia. Everybody wants him because they will have a field day with our country. It'll be the end of our country.”  “Biden cheered China's rise as a great power "because great powers adhere to international norms in the areas of nonproliferation, human rights, and trade." Well, they didn't. They took advantage of stupid people. Stupid people. And Biden is a stupid person. You know that. You're not going to write it. But you know that. The cost of Biden's economic treachery was 60,000 shuttered American factories. And I heard this morning the real number is probably 70,000 -- 70,000 shuttered American factories. And he's talking about how wonderful it is with China. No, China has been very bad, on top of which we had the China plague sent to us and other viruses -- nothing near this serious -- but the swine, and we had other viruses sent in over the years that came from China. I wonder why. If Biden wins, China wins, because China will own this country. If Biden wins, China will own this country, and hopefully you're not going to be able to find that out. It's the most important election in our history, right now. Most important election in our history.” |
| Political Elite | | Biden/Democrats/elite politicians/act against the people's interests  Biden's long career in politics  Questionable income of Biden’s son Hunter | | Trump depicts Democrats as elite politicians who do not care about ‘the people.’  Trump refers to Biden’s long career in politics to illustrate how little he has done in the interest of ‘the people.’  Trump criticizes Biden’s son Hunter regarding his allegedly unexplainable earnings in relation to overseas business, e.g., in Ukraine. | | “We've also delivered nearly five billion dollars in economic relief straight to Minnesota families, you know that, we've kept it all going, and we'd like to do it again, except the Democrats, all they want is one trillion dollars, one trillion. They're not interested in the people, they're not interested in the Post Office. It's all a ruse, it's all a con. They're only interested in getting a trillion dollars, you guys know that, getting a trillion dollars for states that are badly run blue states, very badly run by governors and mayors like New York, Illinois, California, I won't name any more because to be honest, he's going, "Minnesota, I don't know."”  “And I have done more in three years for the Black community than Joe Biden has done in 47 years. And when I am re-elected, the best is yet to come. [Audience chants "Four more years"] Thank you very much. […] They wanted their jobs back. As Vice President, he supported the Trans Pacific Partnership, which would have been a death sentence for the US auto industry. He backed the horrendous South Korea trade deal, which took many jobs from our country, and which I've reversed and made a great deal for our country. He repeatedly supported mass amnesty for illegal immigrants. He voted for the Iraq war. He opposed the mission that took out Osama bin Laden. He opposed killing Soleimani, he oversaw the rise of ISIS, and cheered the rise of China as a positive development for America and the world. Some positive development. That is why China supports Joe Biden, and desperately wants him to win.”  “His son walked out with $1.5 billion of money to invest, where he'll make hundreds of thousands of dollars -- maybe millions of dollars a year. Walked out with $1.5 billion. I asked one of the biggest people on Wall Street -- maybe the biggest -- "Is that possible?" He said, "No." He's never seen it. They don't do that. But Hunter -- where's Hunter? Where is Hunter, by the way? Hunter Biden walked out with 1.5 billion. In Ukraine, he got $83,000 a month and, I guess, an up-front payment of $3 million. So he went from not having a job to getting $83,000 a month, with a lot of money paid upfront to work for Burisma. And you all know about Burisma, but nothing happens. Nobody cares. And he was unemployed, as you know. He was unfortunately forced to leave the military. He was forced to leave. Didn't have a job, and all of a sudden, he's making a fortune. But nobody talks about that.” |
| Politicizing Covid-19 and related issues | | Against Mail Voting/Democrats use Covid as excuse  Biden-Harris/Anti vaccine conspiracy theory/politicizing vaccine  Democrats boycott virus response  Democrats govern states badly/want bailout  Politicization of opening up/of the virus | | Trump alleges that Democrats use the Covid crisis as an excuse to manipulate the election by institutionalizing mail-in ballots.  Trump depicts Biden and Harris as anti-vaccine activists who spread conspiracy theorists to undermine the successes of the Trump administration.  Trump alleges that Democrats boycott the Trump administration’s response to the Covid crisis for partisan issues.  Trump claims that Democrats want to use the money his administration wants to channel to ‘the people’ to save Democratic states that have been poorly governed and thus suffer from financial problems.  Trump alleges that Democrats politicize the virus and block his attempts of ending the lockdowns for political reasons, against the interest of ‘the people.’ | | “The Democrats are also trying to rig the election by sending out tens of millions of mail-in ballots, using the China virus -- [Audience boos] -- as the excuse for allowing people not to go to the polls. "Hey, we have a virus coming. We have to send... "Think of it: California. He's going to be sending out millions and millions of ballots. Well, where are they going? Where are these ballots going? Who's getting them? Who is not getting them? A little section that's Republican. Will they be stolen from mailboxes as they get put in by the mailman? Will they be taken from the mailmen and the mailwomen? Will they be forged? Who is signing them? Who's signing them? What, are they signed on the kitchen table and sent in? Will they be counterfeited by groups inside our nation? Will they be counterfeited, maybe by the millions, by foreign powers who don't want to see Trump win because nobody has been tougher on trade or making our country great again? Nobody. [Applause] No, mail-in ballots is a disaster for our country. It's going to end up in a big -- you know. Look, just -- just forget about all of this stuff. Forget about speeches and teleprompters and all of that. They send out millions of ballots. Who's getting them? How are they delivered? Who's not getting them? Think of it. It's going to be fraud all over the place. And if you look right now -- if you look right now, look at all of the disputes they're having on mail-in ballots.”  “Joe Biden and Kamala Harris rated the most liberal, or undermining science and risking countless lives with their reckless anti-vaccine rhetoric. That's what they're talking about. So, now they know we have it, it's only a question of weeks or a small amount of time. So, instead of saying that's a great thing, we're going to save lives, they're trying to disparage it, they're trying to make it politics, they're trying to do so. And now what's going to happen is we'll have it and people won't want to take it. That's really bad. Ok, that's really bad. But the Biden-Harris effort to spread anti-vaccine conspiracy theories only because they know we're close to putting it out, getting it out, and we're going to get it out fast. The vaccine will be safe.”  “Shockingly incredible. We've been negotiating in good faith with Democrat leaders in the house to extend relief payments. We're negotiating right now as we speak and we'll see how that works out. But if Democrat leaders put partisan demands aside, we would reach an agreement very quickly. It would happen very quickly. In the meantime, my administration's exploring executive actions to provide protections against eviction.”  “And that's really with a minimum of stimulus, because as you know, the Democrats don't want to approve stimulus for people. So, people, all they want to do is get bail out money for their governors who have done so badly in states like New York and Illinois. He's done a traditional job in Illinois. Pritzker is terrible. He doesn't know what he's doing. And, you know, they are having a hard time in California, as you know, although he's treated me very nicely, therefore I'm going to treat him very nicely. But, you know, they are having a hard time. But they want bail out money in other Democrat-run states also. Republicans are doing very well. Republican states are doing great. You look at what's happening, they're doing great. But these Democrats -- and this is long-term. This isn't just over the last few years. This is for many, many years. And they want -- they think they can use COVID-19 or they could use the China plague as we call it to get bail out money. And, you know, we don't want to do that.”  “When the China virus invaded our country, we had no choice but to close down his best car -- best economy ever. And by doing so, we saved millions of lives, but now we're go -- getting it open. We're reopening. We've already gained a record 7.5 million jobs. It's a new record, despite the fact that the Democrats and Biden want to keep it closed for as long as possible and we're not going to do that. They want to do it for political reasons. After November 3rd, the big day, you have to remember is November 3rd, that's Election Day. But after that, you'll find everything gets opened, but they want to keep it open. They want to keep everything as much as they can closed down because the only thing they have in mind is November 3rd, and you don't want Joe Biden as your President.” |
| **Superordinate themes** | | **Sub-Themes** | | **Descriptions** | | **Samples of coded text** | |
| Attacks on the press | | Fake News  No credit for testing  No recognition that more testing leads to more detected Covid cases  Press sides with Democrats | | Trump alleges that the news media lie to the public for political reasons in order to discredit his and his administration’s achievements, particularly in relation to the Covid crisis.  According to Trump, the news media does not recognize his supposedly successful testing strategy.  Trump alleges that the news media ignore that more testing results in more positive results in order to discredit his handling of the Covid crisis.  Trump alleges that the news media are biased, favoring his political opponents, the democratic party. | | “I always treated the Chinese virus very seriously, and have done a very good job from the beginning, including my very early decision to close the "borders" from China - against the wishes of almost all. Many lives were saved. The Fake News new narrative is disgraceful & false!”  “We get no credit for it. You know, we do so much testing, so we end up with, when you do testing, you have cases. You know, we tested more than, I guess, about 65 million tests. India's at 11, Germany's at 3, and we're at 65. When you test, you have cases. But we've done very well, and that was really a visit on COVID, or as I call it, the China plague or the China virus, which is what it is.”  “The number of ChinaVirus cases goes up, because of GREAT TESTING, while the number of deaths (mortality rate), goes way down. The Fake News doesn't like telling you that!”  “But remember this, it's only a small part of our country. It's not a big part, very small but they don't report the facts because they don't want to report those facts because those facts are very bad for Joe Biden and for the radical left and they want them to win.” | |
| Trump as the people's president | | China vs. Farmers  Protecting American People  Trump for the people | | According to Trump, China acted to the disadvantage of US farmers until Trump imposed tariffs on China to compensate US farmers.  Trump claims that he protects US citizens, e.g., from China in general and the pandemic in particular.  Trump claims that he, unlike Democrats, helps citizens who have been suffering from the pandemic. | | “And when China targeted our farmers, we provided $28 billion in relief, we gave our farmers. I said to Secretary Perdue, secretary of agriculture, "Sonny, how much they've targeted our farmers. How much have they been targeted for? " Sir, two years ago it was 12 billion, last year it was 16 billion, 28 billion total." I said, "Guess what? We're charging tariffs of $28 billion to China." We charged so much more and we gave 12 billion, and 16 and 28. We gave -- any farmers in here, any farmers?”  “Thank you very much. And thank you for being here to discuss the relentless work that we're doing to defeat the China virus and protect the people of Florida.”  “The Democrats are also holding up money for schools and hospitals and small businesses and state and local governments. They tried to stop Americans from getting unemployment insurance and protection from evictions, which is why I took this decisive action. And I did executive orders, which are now in full force and effect. And going forward, I signed a directive to provide a total of $400 of additional support for Americans who are unemployed due to the China virus. That's $400 more than the Democrats that provided” | |
| Dividing vs. unifying the country | | Together  Take a knee in sports/not patriotic  Trump as a divider, Democrats say  Bridging the societal divide | | Trump claims that the fight against the pandemic is a unifying force, nationally as well as internationally.  Trump frames the “take a knee” ritual in spectator sports as a non-patriotic, divisive act.  According to Trump, Democrats untruthfully portray him as a divider.  Trump claims that the answer to the question of how to unify the country lies in the economy and in law and order. | | “As we all know, we must make shared sacrifices, and that's what we're doing as a country. It's been amazing to see the way the country has come together. There's tremendous spirit. And even Republicans and Democrats are getting together -- for the most part, but they're getting together.”  “So, college football, get out there and play football. People want to see it. And stand for your American flag, stand for your national anthem because people are not happy when that doesn't happen. You look at the NBA and what's happening with the NBA and their poor ratings. I don't know; can't imagine why. But they didn't stand, they didn't show respect to our flag. They didn't show respect to our anth- -- our National Anthem. And maybe that's having an impact, but just not good. The NFL had its problems, two years ago, when that happened. They went way down in their ratings and their fans, and they struggled back. And now, all of a sudden, they're putting themselves in the same position. So stand for your flag and stand for the National Anthem, and I think you're going to do fantastically well. Because a lot of people aren't going to watch if you don't; I'm one of them.”  “And she [Michelle Obama] not only taped it, but tell me when you hear a divisive speech... They talk about me as being a divider. I'm not a divider. I bring people together. We were bringing people together. We were bringing people together, like never before. Success was bringing everyone together, and then we got hit with the China virus, but we were bringing people together.”  “Well, we had it [a unified country]. It was done. And then the virus came in. We were very successful. The division was ending. We had the highest unemployment rates in a positive way. But we had the best employment numbers that we've ever had. And it was done. Success was bringing us together. And then the China virus came and now we have to do it again. We're already doing it. The level of employment, the retail sales, the manufacturing numbers are higher than they were even before. So we're doing it again. The problem areas that you're talking about, in every case they're Democrat run, weak run areas, whether it's Portland or Chicago or New York. And those are areas, Republican areas don't have any problem. If they don't straighten it out, I'll straighten it out. But we need law and order.” | |
| 2020 protests, racial unrest | | Against left-wing protesters  Radical left divides country by race  Democrats responsible for riots/states and cities no law & order  George Floyd protests vs. Jobs back  Left wing riots/protests vs. law enforcement  Military vs. Protesters  Portland  Democrats want to destroy history of USA  Hate vs. love  Democrats and press side with protesters | | Trump rallies against left-wing protesters that he views as destructive as well as supported by news media and Democrats, emphasizing his own stance on law and order.  Trump claims that the left, including left-wing news media are responsible for the societal divide along racial lines, whereas his own party would be the unifying agent.  Trump blames the escalation of social protests on Democrats’ allegedly weak stance on law and order which he contrasts with his own.  Trump claims that the means of improving race relations is to improve employment numbers.  Trump’s immediate answer to the social protests consists in law enforcement.  Trump prides himself with employing the military to successfully combat social protests.  Trump depicts the protests in Portland as an example of the incapability of Democrats to maintain law and order.  Trump maintains that Democrats aim at demolishing the history of the USA.  Trump claims that the Democrats hate their own country, whereas his own followers would act out of love for their country.  According to Trump, the news media as well as the Democratic party support riots in the context of social protests. | | “Let people see what radical left Democrats will do to our country, right? [Audience responds "Yeah"] But Americans have watch left-wing radicals burn down buildings, loot businesses, destroy private property injure hundreds of dedicated police officers. These police officers, they get injured, they don't complain. They're incredible. And injure thousands upon thousands of people, only to hear the radical fake news say, what a beautiful rally it was. And they never talk about COVID. They don't talk about -- when you see 25,000 people walking down Fifth Avenue or walking down a street of a Democrat-run city. You never hear them saying, they're not wearing their mask. You don't hear them say, as they're breaking windows and running in. And then, when I say, the looters, the anarchists, the agitators, they'll say, what a terrible thing for a President to say.”  “The Republican Party is the party of Abraham Lincoln, remember that. We stand for so much, including Martin Luther King's dream of a nation, where our children are judged not by the color of their skin, but by the content of their character. You know that. The radical left's effort to divide everyone by race tears us apart. There's so much racial hatred and it's put there by CNN, by MSNBC.”  “Today, we announced that Operation LeGend has successfully resulted in nearly 1,500 arrests already. Bad ones. Bad ones. Really bad people. Prosecutions and prison sentences will follow. And they'll be a very long time in prison for what they've done to these cities. Most cities are well run; most of the nation is well run. And the areas that we're talking about are all -- in all cases, run by Democrats, usually radi- -- radical-left-leaning Democrats, like in New York or in Portland. We've made arrests in Kansas City, Chicago, Cleveland, Detroit, Milwaukee, St. Louis, Memphis, and Albuquerque for many violent crimes, including gun crimes, arson, and 91 murders. We're also using the full power of the federal government to defeat, as you know, the China virus.”  “Well, I think what I have to do is get jobs back. I mean, if you want to know the truth, I do. I am empathetic. I met with some of the greatest people yesterday. Parents of -- of young men and women who were, in some cases, accidentally and other cases, who knows about accidents, right? But, children that were killed and it was a very sad thing. No, I -- I feel tremendous sorrow and loss. At the same time, I have to get the economy going again and I'll do that. It's already happening because when I get people's jobs back and I believe next year will be actually better than ever before.”  “I also want to provide an update on left-wing political violence that we're seeing in Democrat-run cities. Under my administration, federal law enforcement is working with state and local authorities all over the country to comb through hours of video, track down rioters, looters, and arsonists, and bring them to justice. We've just come up with a report that we've arrested a large number of people. It's over 200. And you'll be hearing about that, but they've been arrested in various cities throughout the United States. We're doing it very low key, but we're trying to help cities.”  “We have record-low crime numbers but you look at some of the states run by Democrats, run cities also run by Democrats. It's really very, very disgraceful and we look forward to solving that problem. We have no choice but to get involved. So we have -- and wherever we're involved, Minneapolis as an example, they went rampant and then we had the National Guard. As soon as we send in the National Guard, everything stopped, everything stopped.”  “Mayor Wheeler has abdicated his duty and surrendered his city to the mob. As a result, the mob descended upon a police precinct and tried to burn it down, tear it down, rip it down -- an act of attempted murder. Leftwing, violent extremism poses an increasing threat to our country, and we stop it. You have no idea how much we stop, but it's an ideology we have to stop.”  “And you see what's going on on the other side, it's just not Acceptable, but this great movement and the radical left. I mean, if you think of it, it's a left-wing mob and they want to defund the police. They want to raise your taxes. They want to tear down our history. They want to absolutely get rid of our great history and they want to demolish, and that will happen, demolish our economy.”  “The Democrats are consumed with hatred for our history, for our heritage and our constitution, our values, our police, our traditional values, our businesses, and most of all, the hatred for anyone who rejects their politically insane ideas, their dogma, but their ideas. They can't stand it, but our movement is based on love of our country and our communities, our fellow citizens, and our American flag. We're fighting to save America and with your help, we will win.”  “Let people see what radical left Democrats will do to our country, right? [Audience responds "Yeah"] But Americans have watch left-wing radicals burn down buildings, loot businesses, destroy private property injure hundreds of dedicated police officers. These police officers, they get injured, they don't complain. They're incredible. And injure thousands upon thousands of people, only to hear the radical fake news say, what a beautiful rally it was. And they never talk about COVID. They don't talk about -- when you see 25,000 people walking down Fifth Avenue or walking down a street of a Democrat-run city. You never hear them saying, they're not wearing their mask. You don't hear them say, as they're breaking windows and running in. And then, when I say, the looters, the anarchists, the agitators, they'll say, what a terrible thing for a President to say.” | |
| Greatest Economy prior to and after Covid-19 | | Great/best Economy/before and soon again/The V/employment numbers  Stock Market  De-regulation/tax cuts/less bureaucracy | | Trump claims that his presidency led the USA to the best economy in history prior to the Covid crisis and will achieve this again as a V shaped recovery.  Trump prides himself with helping the stock markets to climb to record levels, which came to an only momentary halt due to the pandemic.  Trump situates the roots of his alleged economic success in de-regulation and tax cuts, which he also considers a factor that ensures a quick recovery after the pandemic. | | “You know, the two jobs numbers that you mentioned, the 2.8 and the almost five million, those are record numbers in history. We have never created jobs to the level that we have now. And before the China plague came in, the China virus, whatever you want to call it came in, we were beating everybody so badly, including China. We were beating everybody. China had the worst year they had. The tariffs have hurt them. They had the worst year they have had. And we have taken in billions and billions of dollars in tariffs. They had the worst year in 67 years, whereas we had the best year we have ever had. And then we got hit with the plague. But now we are rebuilding it. And it's going much faster than anybody thought possible, a V.”  “Before the China plague came in -- and it's the China plague -- before that came in, we had the best job numbers we've ever had. We had the best economy we've ever had. We had the best stock market we've ever had, which, by the way, is getting very close to those numbers anyway. And in NASDAQ, it's actually beat those numbers.”  “We passed the largest package of tax cuts and tax reforms, and we passed the largest number of regulation cuts, by a factor of many times. No other administration -- even though, in some cases, eight years, and in one case, more -- nobody has cut regulation like we've cut regulation. Not even close. [Applause] And it's one of the reasons we did so well before the plague and we're doing so well after the plague.” | |
| Pro Military | | Trump rebuilt military  Bringing troops home  Pro veterans | | Trump claims to have rebuilt the US military, which allegedly had been in a poor state prior to his presidency.  Trump takes credit for bringing home US troops from war zones.  Trump claims that his administration and himself have taken care of issues important to veterans. | | “At the same time, we had the most powerful and we will have the most powerful military by far. You need it just in case, you never want to have to use it, but you have to have it. And frankly, it's a very good negotiating chip. We have -- and I've built -- because when I came in it was a totally depleted military, it was under siege, our people weren't treated properly, our great warriors weren't treated properly and it was very unfair to the people in the military. So, they've given pay raises and we've bought equipment, the likes of which we've never done before to this extent. So, we took a depleted military and made it great.”  “After years and years of rebuilding other countries, we are finally rebuilding our country. It's called "America first." America first. It's enough, and we are bringing our soldiers back home, you see what is going on. After 19 years in Afghanistan, far away places.”  “So we passed that, it's all done. We passed the V.A. Accountability and V.A. Choice. Nobody thought either of those were possibility. Now, people are accountable for taking care of our vets and if you have to wait, if you have to wait on line for days and weeks and months for a doctor, you go out to get a private doctor and we pay the bill if you're a vet. So we take care of our vets, had 91% approval rating recently, the highest ever by a lot.” | |
| Natural Disasters | | Hurricanes and tornadoes  Wildfires and storms | | Trump claims that the federal government/his administration successfully helps states to combat hurricanes and tornadoes, particularly with the support of FEMA (Federal Emergency Management Agency).  Trump claims that the federal government/his administration successfully helps states to combat Wildfires and storms. | | “Last week, I signed an emergency declaration under the Stafford Act, which, as you know, we invoked previously and which activated FEMA's National Response Coordination Center. FEMA now is fully engaged at the highest levels. Today, FEMA is activated in every region. We are at level one -- level one being the highest level -- which we will work with, and we've been working with FEMA. I've done a lot of work with FEMA. They're incredible. It's always been on hurricanes or tornadoes.”  “But before I discuss a very historic breakthrough in our fight against the China virus, I'd like to provide an update on the recent wildfires in California and the storms in the Gulf of Mexico. Yesterday, I approved a major disaster declaration for California.  I spoke to Governor Newsom as they battle two of the worst wildfires in the history of their state.  That continues.  The federal government has already deployed over 26,000 first responders and personnel to battle the wildfires.” | |
| War on Covid-19 | | Greatest Mobilization since WW2  Hidden enemy/invisible China virus  Military vs. Covid  War against pandemic | | Trump claims that his efforts of combating Covid-19 have to be considered the Greatest mobilization since WW2, the results of which not only be benefit not only the USA but also other countries.  Trump portrays Covid-19 as the hidden/unseen enemy, the invisible China virus.  Trump claims to have prepared the military to support his administration and individual states in the fight against Covid-19, primarily logistically.  Trump depicts the efforts of containing the pandemic as a war. | | “My administration has also eliminated massive regulatory barriers in our battle against the China virus. These actions save countless lives, speeding up the production of equipment. That means ventilators like nobody has ever seen before. Probably the greatest source of manufacturing, the greatest achievements since World War Two. We're now making ventilators for countries all over the world.”  “Our goal is to beat the virus, and we will -- we call it the hidden virus, the hidden enemy -- with aggressive action now so that we can rebound stronger than ever before, and that's what we're doing.”  “We've dramatically ramped up production of materials needed for a vaccine and are on track to rapidly produce 100 million doses as soon as a vaccine is approved, which could be very, very soon, and 500 million doses shortly thereafter. So we'll have 500 million doses. And, logistically, we're using our military, our great military -- a group of people; their whole life is based around logistics and bringing things to and from locations -- and they'll be able to take care of this locationally and bringing it where it has to go very, very quickly. They're all mobilized. It's been fully set up. A very, very talented general is in charge.”  “I would like to begin by announcing some important developments in our war against the Chinese virus. We'll be invoking the Defense Production Act, just in case we need it.” | |
| Energy vs. environment | | Anti Green Deal  Energy industry is up (again)  Trump as environmentalist | | Trump criticizes the Green New Deal as an unviable project.  Trump claims that he has saved the energy sector and the jobs therein.  Trump claims to be an environmentalist whose politics benefit the environment. | | “We are setting all sorts of really good environmental records we are very proud of that, but the Green New Deal would kill our country. The Green New Deal would have a devastating effect on the world, and it's not going to happen anyway because it's impossible for them to do it. If you ever look at what they want to do under the Green New Deal, it's like baby talk but we are doing something”  “Recently, it looked like the energy business was going to be a catastrophe. We were number one in the world, and then we had the pandemic, and nobody was using energy. Nobody was driving in automobiles, no gasoline. And by the way, gasoline prices for everyone are very, very low -- in many cases, less than $2. That's pretty incredible. And I saved the energy business. I got Russia and I got Saudi Arabia on the phone, and they cut way back. And we're now at $40-and-plus a barrel. And we're saving tens of millions of jobs in energy. We're the number-one in energy in the world.”  “I'm a big environmentalist, I believe strongly in taking care of our environment. We have the cleanest air we've ever had like over the modern era, which let's say you go back 30 years we have the cleanest air the cleanest water we have ever had.” | |
| 'Race' Relations/Politics of Recognition | | Criminal Justice Reform  Opportunity Zones  Pro Women  Pro Hispanic/African/Asian  Pro Youth/regardless of education  Democrats against workers, African Americans... | | Trump presents himself as a social reformer who improved the criminal justice system.  Trump prides himself on having improved social equality by facilitating investments in low income areas as designated “opportunity zones.”  Trump presents himself as a women’s rights advocate whose efforts had improved gender equality prior to the pandemic.  Trump claims that he has improved the situation of ethnic minorities in the USA.  Trump claims he has improved the situation of young people, regardless of their educational background.  Trump alleges that the policies of the Democratic party would work against underprivileged groups. | | “And we did criminal justice reform. We did tremendous opportunity, if you look at the opportunities we have given everybody.”  “To bring jobs and prosperity to our most distressed communities, we created nearly 9,000 Opportunity Zones -- that's been a great success, a tremendous -- Tim Scott of South Carolina has helped them so much -- [applause] -- which have already brought nearly $100 billion in investment to neighborhoods where millions of Hispanic Americans live.”  “Today, a record-breaking 131 women are serving in Congress. Nearly 70 million women vote in elections. Fifty-six percent of our nation's college students are women. More than 11 million women own successful businesses. In other words, women dominate the United States. [Laughter] I think we can say that very strongly. Before the China virus set in and struck our nation, women had gained 4.3 million jobs -- a record. The women's unemployment rate had plummeted to the lowest level in more than 65 years. And last year, over 70 percent of the new jobs went to women.”  “And before the China virus came in, produced the best unemployment numbers for African-Americans, Hispanic-Americans, and Asian-Americans ever recorded. And I say very modestly that I have done more for the African-American community than any President since Abraham Lincoln, our first Republican President. And I have done more in three years for the Black community than Joe Biden has done in 47 years. And when I am re-elected, the best is yet to come.”  “I mean everybody, students that never got a degree in high school, students that did get their high school degree, colleges, PhDs, everything, record-low unemployment. We employed more than 160 million people prior to the plague coming in from China and now we're bringing it back again very, very quickly.”  “Democrat politicians have failed the Black community for decades and they've failed every community frankly, if you look at what's happened. Perhaps in no area they'll have our opponents more thoroughly betrayed. Working families of all backgrounds and, on the subject of immigration.” | |
| Trump improved health care | | Anti-Obama Care  Reducing drug prices - against big pharma/for the people  Kodak deal  Trump's improvement of health system  Generic drugs | | Trump depicts Obama Care as an coercion to pay for a low-quality health insurance.  Trump claims that he has brought big pharma companies to offer their drugs to more affordable prices.  Trump announces that his administration wants to channel funding to Kodak, so that the company can convert into a pharmaceutical company that produces in the USA.  Trump claims that he has improved the health care system for critically ill people.  Trump claims that his administration made health care more affordable by approving generic drugs. | | “We eliminated Obamacare's unfair individual mandate -- [applause] -- which punished young Americans, like you, for the privilege of not buying bad health insurance. That's really what it was. You had the privilege of not buying, and you had to pay for it. Not too good, so we got rid of it. That was a big deal. That was one of the most unpopular things anywhere, on any subject.”  “We have -- in 51 years, the only time prices came down was during this administration. It was last year. Fifty-one years it went up. But that was just a small decline. This is a massive decline. This is a decline that nobody can believe. I was called by senators, I was called by congressmen: "Please don't do this." But big pharma doesn't mean anything to me other than we want them to do a great job. We want them to get their vaccines. We want them to do what has to be done. So I think you're going to see drug price reductions over the next four or five or six months -- it'll probably take a little while to kick in -- that are going to be at numbers that you wouldn't believe.”  “With this new agreement, my administration is using the Defense Production Act to provide a $765 million loan to support the launch of Kodak Pharmaceuticals. It's a great name, when you think of it. Such a great name. It was one of the great brands in the world. Then people went digital, and Kodak didn't follow. But now, under very extraordinary leadership, they are following and they're doing something that's a different field, and it's a field that they've really hired some of the best people in the world to be taking care of that company and watching that company -- watching over it. But it's a breakthrough in bringing pharmaceutical manufacturing back to the United States.”  “We passed Right to Try to give critically ill patients access to lifesaving cures, so they don't have to travel all around the world and see if they can find. And we've had tremendous success with that. Right to Try. I'm very proud of it. They've been trying to get that one done for 40 years, too.”  “Ninety percent of all prescriptions written in the United States are for generic drugs. We have approved more generic drugs than any other administration, by far. Generic drugs can be just as good as the brand names, but cost much less.” | |
| Attacks on China | | 188 countries suffer from Covid  China ripped off USA  Protect US financial system from China  China steals intellectual property  China happy that china virus impacts Trump presidency  China responsible for virus  China's worst year in 67 years/long time/reproach of virus cause  Terminating support of China controlled WHO | | Trump blames China for letting Covid-19 get out of their country.  Trump blames China for taking advantage of the USA prior to his administration.  Trump alleges that Chinese companies whose shares are traded in the USA bear hidden risks for investors due to transparency and fairness issues.  Trump claims that China steals intellectual property from the USA.  Trump alleges that China is happy about Covid-19 threatening his re-election.  Trump holds China responsible for Covid-19.  Trump claims that China’s economy had been suffering prior to the outbreak of Covid-19 and implies that the spread of the pandemic is in the interest of China.  Trump claims that China controls the WHO and terminates US funding of the WHO. | | “You can call it a lot of different things, the China virus, call it whatever you want. But it should have been stopped, should have never been allowed to come here. Should have never been allowed to come into our country. They could have stopped it and they didn't. It went all over the world, 188 countries are suffering and still suffering, and some very greatly but we have that under control.”  “Look, China has taken advantage of the United States -- until I came here -- with Sleepy Joe Biden and Obama and Bush and everybody else. I'm not blaming them; I'm blaming everybody. They were allowed to -- $500 billion a year they were taking out. We had trade deficits that were so large nobody's ever seen anything like it.”  “I am also taking action to protect the integrity of America's financial system -- by far, the best in the world. I am instructing my Presidential Working Group on Financial Markets to study the differing practices of Chinese companies listed on the U.S. financial markets, with the goal of protecting American investors. Investment firms should not be subjecting their clients to the hidden and undue risks associated with financing Chinese companies that do not play by the same rules. Americans are entitled to fairness and transparency.”  “For years, the government of China has conducted illicit espionage to steal our industrial secrets, of which there are many. Today, I will issue a proclamation to better secure our nation's vital university research and to suspend the entry of certain foreign nationals from China who we have identified as potential security risks.”  “For years, the government of China has conducted illicit espionage to steal our industrial secrets, of which there are many. Today, I will issue a proclamation to better secure our nation's vital university research and to suspend the entry of certain foreign nationals from China who we have identified as potential security risks.”  “I think what China has done to the world with what took place -- the China plague -- you can call it the China virus; you can call it whatever you want to call it. It's about 20 different names. What they did to the world should not be forgotten.”  “We were beating China, beating everybody. They were having the worst economy they've had in over 67 years. So we were doing with the tariffs and all the things that I was doing. And then we had to close it up. It came from China. They should have stopped it. They could have stopped it, but they didn't. They stopped it from going into their country, but they didn't stop it from here, Europe, or the rest of the world.”  “China has total control over the World Health Organization, despite only paying $40 million per year compared to what the United States has been paying, which is approximately $450 million a year. We have detailed the reforms that it must make and engage with them directly, but they have refused to act. Because they have failed to make the requested and greatly needed reforms, we will be today terminating our relationship with the World Health Organization and redirecting those funds to other worldwide and deserving, urgent, global public health needs.” | |
| Political Correctness | | “Wuhan virus” used to be a term commonly used  Political enemy as fraud/not authentic  Reasons for using "China Virus"  There are many names vs. political correctness  Xenophobia/racism | | Trump insinuates that it was common (even among news media) to call Covid-19 “Wuhan virus.”  Trump depicts his political opponents as not authentic/phony.  Trump gives reasons for using terms like “Chinese virus,” “China virus,” etc.  Trump trivializes the use of terms like “China virus,” and “China plague” by pointing at the plethora of expressions that are used to designate Covid-19.  Trump addresses reproaches of xenophobia and racism that were made regarding his handling of the virus and/or the statements he made. | | “On January 21st, okay -- still early -- there was one case of the virus. At that time, we called it the "Wuhan virus," right? Wuhan. There was one case in the whole United States. We have one case. This is all documented. It all comes from you. A lot of it comes from you people.”  “Here’s what serial fraudster, & generational corruptocrat, Nancy Pelosi was REALLY up to when the Wuhan virus was raging & the POTUS was correctly banning certain travel from China. She’s a fraud, & you’re a moron, if you buy her obvious BULLSHIT.”  “I think it was time though, because, you know, I talk about the Chinese virus and -- and I mean it. That's where it came from. You know, if you look at Ebola, if you look at all -- Lyme. Right? Lyme, Connecticut. You look at all these different, horrible diseases, they seem to come with a name with the location. And this was a Chinese virus.”  “But look, the bottom line is that the job we've done on COVID-19 or the China virus, the China plague -- call it whatever you want; got a lot of different names -- but it's been incredible.”  “Well, you remember what happened. Because when I did act, I was criticized by Nancy Pelosi, by Sleepy Joe Biden. I was criticized by everybody. In fact, I was called xenophobic. I was asking Biden to please define that for me. I was called other things by Democrats and some others -- not too many others, actually. So that -- by the media, definitely.” | |
